# Supplementary material for: Synthesis and high-rate performance of spinel Li4Ti5O12 with core–shell hierarchical macro–mesoporous structure
Source: Royal Society of Chemistry journal article supplement (doi:10.1039/c3nj01305g), 2014-01-01
Supplement: c3nj01305g.pdf [file c3nj01305g.pdf]

## Supplementary Information for

### “Synthesis and high-rate performance of spinel $\text{Li}_4\text{Ti}_5\text{O}_{12}$ with core-shell hierarchical macro-mesoporous structure” by

Yingying Zhao, Jie Sun, Xu Chen, Hong Zhu, and Wensheng Yang\*

State Key Laboratory of Chemical Resource Engineering, Beijing University of Chemical Technology, Beijing 100029, China

#### 1. The precursor prepared by using a hydrothermal reaction method

The XRD pattern of the precursor with a hydrothermal reaction time of 48 h is shown in Fig. S1. The pattern of the precursor indicates that it is a mixture of anatase titania and layered hydrous lithium titanate species (M. Sugita, M. Tsuji, M. Abe, Bull. Chem. Soc. Jpn., 1990, 63, 1978).

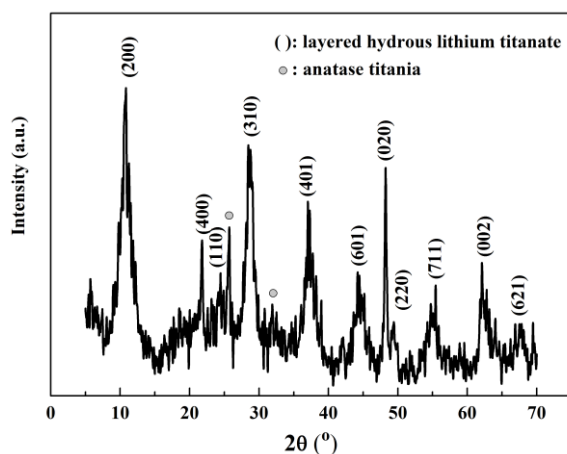

**Fig. S1** XRD pattern of the precursor with a hydrothermal reaction time of 48 h. Reflections originating from  $\text{TiO}_2$  are indicated by solid dots.

The SEM image of the precursor with a hydrothermal reaction time of 48 h is shown in Fig. S2. The precursor has a core-shell hierarchical macro-mesoporous structure. The shells are constructed by a large number of nanosheets all pointing

toward the center of the sphere.

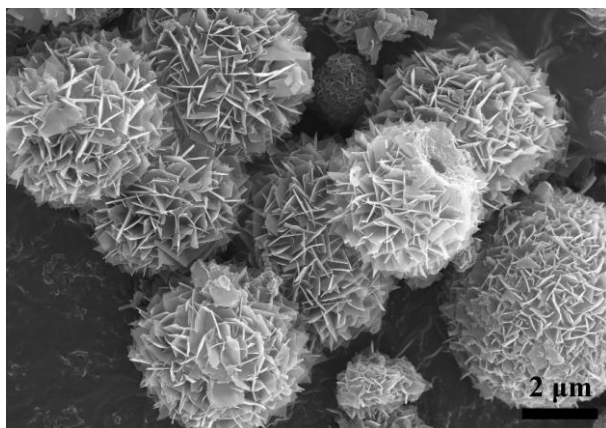

**Fig. S2** SEM image of the precursor with the hydrothermal reaction time of 48 h.

The SEM image of the precursor with the hydrothermal reaction time of 72 h is shown in Fig. S3. The precursor of 72 h still has the similar structure with the precursor of 48 h, but the cores are almost dissolved.

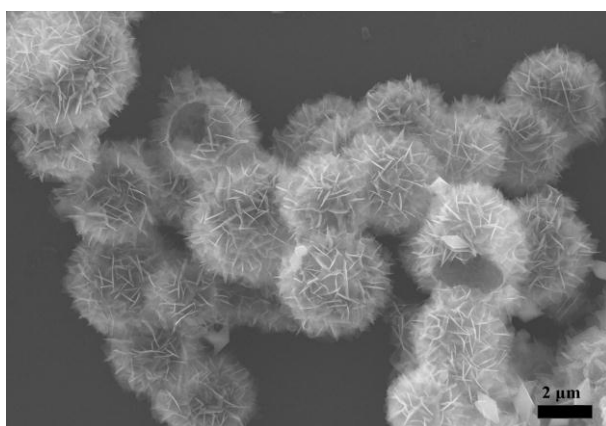

**Fig. S3** SEM image of the precursor with the hydrothermal reaction time of 72 h.

## 2. The control sample of bulk $\text{Li}_4\text{Ti}_5\text{O}_{12}$

Bulk  $\text{Li}_4\text{Ti}_5\text{O}_{12}$  (labeled as B- $\text{Li}_4\text{Ti}_5\text{O}_{12}$ ) was prepared by using a solid state reaction method from  $\text{Li}_2\text{CO}_3$ ,  $\text{TiO}_2$  (anatase structure) with a Li:Ti molar ratio of 4.2:5.0. Then, the mixture was ball-milled in a container containing ethanol for 3 h and dried at  $80^\circ\text{C}$  for 12 h. Finally, the mixture was fired at  $600^\circ\text{C}$  for 8 h and  $800^\circ\text{C}$

for 12 h in air.

The XRD pattern of B-Li<sub>4</sub>Ti<sub>5</sub>O<sub>12</sub> is shown in Fig. S4 and all of the diffraction peaks can be indexed well as the spinel structure of pure Li<sub>4</sub>Ti<sub>5</sub>O<sub>12</sub>.

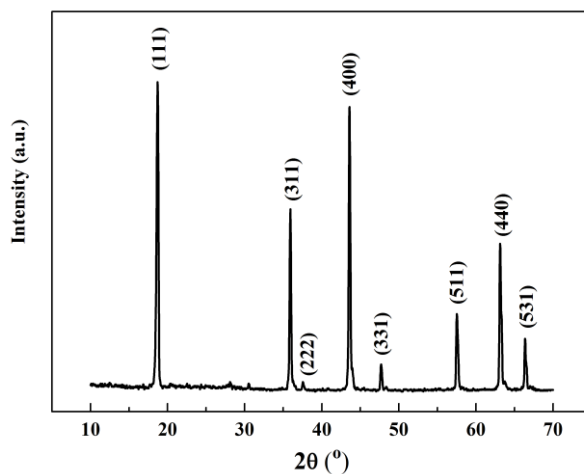

**Fig. S4** XRD pattern of B-Li<sub>4</sub>Ti<sub>5</sub>O<sub>12</sub> prepared by using a solid state reaction method.

The SEM image of B-Li<sub>4</sub>Ti<sub>5</sub>O<sub>12</sub> is shown in Fig. S5. The B-Li<sub>4</sub>Ti<sub>5</sub>O<sub>12</sub> has a glazed surface and an average particle size of about 500 nm.

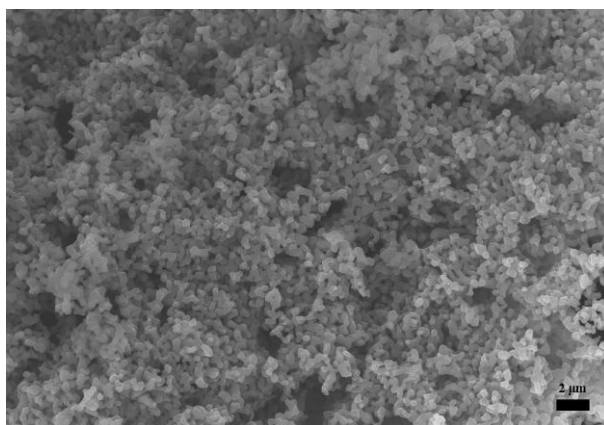

**Fig. S5** SEM image of B-Li<sub>4</sub>Ti<sub>5</sub>O<sub>12</sub> prepared by using a solid state reaction method.
